# Supplementary material for: c‐Kit Mutation and Localization Status as Response Predictors in Mast Cell Tumors in Dogs Treated with Prednisone and Toceranib or Vinblastine
Source: PubMed Central journal article supplement — J Vet Intern Med. 2017 Nov 30;32(1):394–405. doi: 10.1111/jvim.14889 (PMC5787208; doi:10.1111/jvim.14889), 2017-11-30
Supplement: JVIM-32-394-s001.pdf [file JVIM-32-394-s001.pdf]

Table S1. Categories of concomitant medications administered to dogs with mast cell tumors receiving vinblastine compared to toceranib.

| Category      | Toceranib          |               | Vinblastine        |               |
|---------------|--------------------|---------------|--------------------|---------------|
|               | # Dogs Treated (%) | # Times Rx'ed | # Dogs Treated (%) | # Times Rx'ed |
| Anti-nausea   | 16 (27)            | 20            | 6 (21)             | 7             |
| Anti-diarrhea | 29 (48)            | 32            | 9 (32)             | 10            |
| Antibiotics   | 19 (32)            | 31            | 12 (43)            | 12            |
| Cardiac/BP    | 5 (8)              | 9             | 1 (4)              | 3             |
| Ocular        | 2 (3)              | 4             | 1 (4)              | 6             |
| Pain          | 21 (35)            | 25            | 8 (29)             | 11            |
| Supplements   | 7 (12)             | 12            | 2 (7)              | 3             |
| Miscellaneous | 23 (38)            | 35            | 7 (25)             | 10            |
| None          | 10 (17)            |               | 5 (18)             |               |

Legend: BP, blood pressure.

Medications included in each category are as follows: 1) Anti-nausea: maropitant, ondansetron, metoclopramide, bismuth subsalicylate; 2) Anti-diarrhea: metronidazole, tylosin, loperamide; 3) Antibiotics: enrofloxacin, trimethoprim sulfa, cephalexin, Clavamox, amoxicillin, Simplicef, Convenia, cefazolin, clindamycin, Unasyn, ampicillin, minocycline; 4) Cardiac/BP: enalapril, amlodipine, atenolol, aspirin; 5) Ocular: prednisolone acetate 0.1% ophthalmic, cyclosporine ophthalmic 2%, Diclofenac, tobramycin ophthalmic, Genteal, Sochlor 5% ointment, terramycin, Vigamox solution, gentamicin ophthalmic; 6) Pain: tramadol, gabapentin, amantadine, carprofen, hydromorphone, lidocaine, Tylenol 3; 7) Supplements: glucosamine, Denamarin, fish oil,

Cosequin; 9) Miscellaneous: variety of medications to treat otic infections, urinary incontinence, hypothyroidism, and skin conditions, as well as other gastrointestinal medications, etc.

Table S2. Characteristics of disease progression in dogs being treated with toceranib or vinblastine.

|                                | <b>Toceranib<br/>(n=54)</b> | <b>Vinblastine<br/>(n=27)</b> |
|--------------------------------|-----------------------------|-------------------------------|
| Local only                     | 15 (28%)                    | 7 (26%)                       |
| <i>De novo</i> only            | 2 (4%)                      | 1 (4%)                        |
| Metastasis to lymph node       | 1 (2%)                      | 1 (4%)                        |
| Local + <i>de novo</i>         | 3 (6%)                      | 3 (11%)                       |
| Metastasis to spleen           |                             | 1 (4%)                        |
| Progressive lymph node         | 1 (2%)                      |                               |
| Metastasis to spleen + liver   | 1 (2%)                      |                               |
| Local + progressive lymph node |                             | 1 (4%)                        |
